# Supplementary material for: Understanding the bulk and interfacial structures of ternary and binary deep eutectic solvents with a constant potential method: a molecular dynamics study
Source: Royal Society of Chemistry journal article supplement (doi:10.1039/d2cp01014c), 2022-01-01
Supplement: d2cp01014c1.pdf [file d2cp01014c1.pdf]

Supporting Information

**Understanding of Bulk and Interfacial Structures Ternary and Binary Deep Eutectic  
Solvents with a Constant Potential Method: A Molecular Dynamics Study**

**Kayvan Moradi<sup>a,b,\*</sup>, Sirvan Rahimi<sup>a</sup>, Sadollah Ebrahimi<sup>b,c,d,\*</sup>, Abdollah Salimi<sup>a,b,\*</sup>**

<sup>a</sup>Department of Chemistry, University of Kurdistan, 66177-15175, Sanandaj, Iran

<sup>b</sup>Research Center for Nanotechnology, University of Kurdistan, 66177-15175, Sanandaj,  
Iran

<sup>c</sup>Department of Physics, Faculty of Science, University of Kurdistan, Sanandaj, Iran

<sup>d</sup>Laboratory of Physical Chemistry of Matter (LPCM), Department of chemistry, Université  
de Sherbrooke, Sherbrooke, Canada

---

\* Corresponding authors: Tel.: +98 8733624001; fax: +98 87336624008.

E-mail addresses: [absalimi@uok.ac.ir](mailto:absalimi@uok.ac.ir), [absalimi@yahoo.com](mailto:absalimi@yahoo.com) (A.Salimi),

E-mail address: [kayvan.moradi.1993@gmail.com](mailto:kayvan.moradi.1993@gmail.com) (K.Moradi),

E-mail addresses: [s.ebrahimi@uok.ac.ir](mailto:s.ebrahimi@uok.ac.ir), [sadollah.ebrahimi@usherbrooke.ca](mailto:sadollah.ebrahimi@usherbrooke.ca) (S.Ebrahimi)

**Table S1:** The calculated and experimental value of the density of the ternary DES at 300.15 K. The relative percent deviations (Dev%) a between the calculated and experimental value.

| Property                       | Simu. | Exp.  | Dev% |
|--------------------------------|-------|-------|------|
| Density (gr.cm <sup>-3</sup> ) | 1.158 | 1.136 | 1.9  |

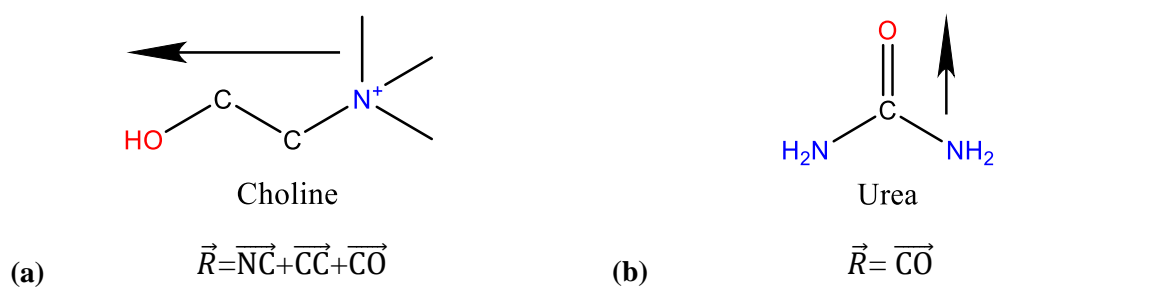

**Figure S1:** Direction vectors were used for the computation of orientational order parameters (a) choline cation and (b) urea.

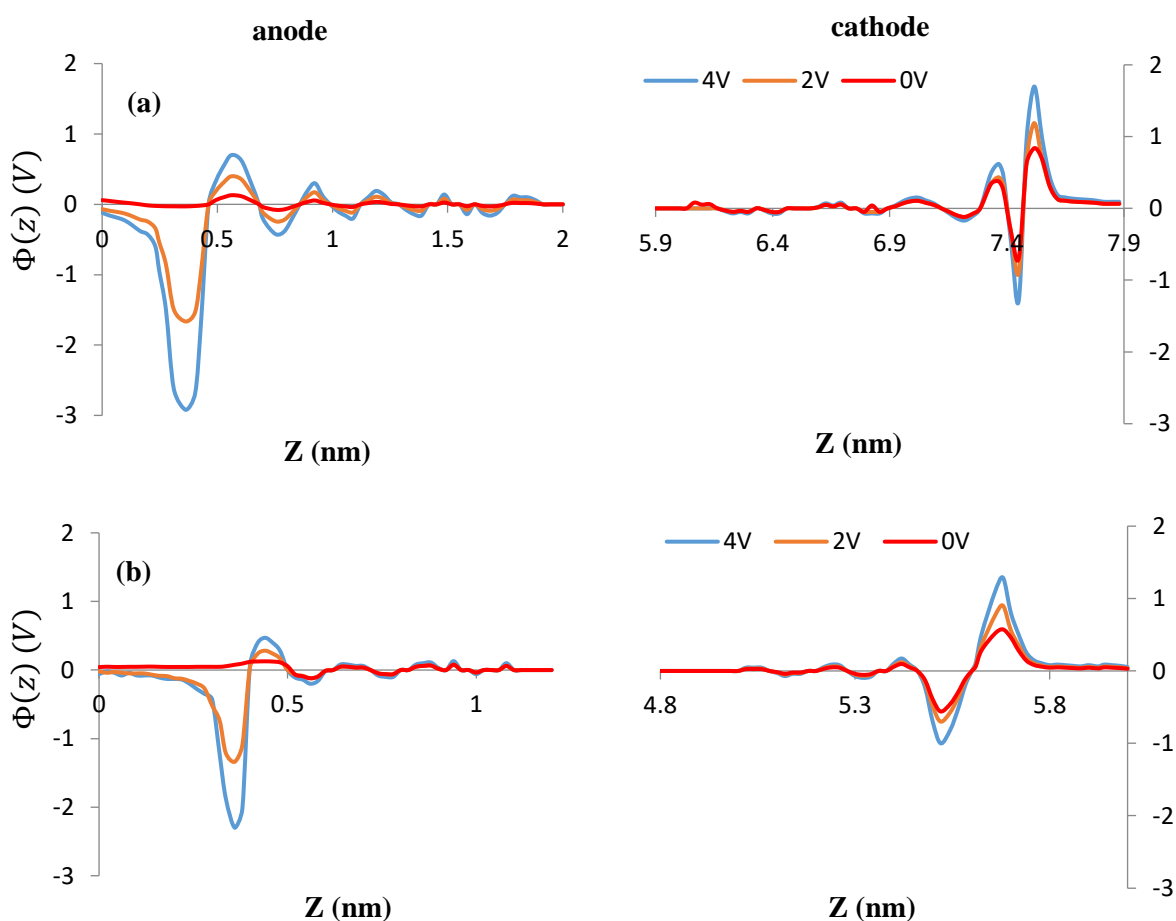

**Figure S2:** The electrostatic potential (V) as a function of the distance between graphene sheets ( $Z$ ) for the two types of supercapacitors investigated. (a) DES-t (b) DES-b
